anticipated<sup>6</sup> changes in serum K<sup>+</sup> in response to catecholamine release during anesthesia and surgery<sup>7</sup> may be modified by  $\beta$ -2-adrenoceptor blockade.

JORGE TORRETTI, M.D.

JOHN I. GERSON, M.D.

RICHARD P. OATES, PH.D.

JEANNE S. LANGE, R.N., C.C.P.

*Departments of Anesthesiology, Pharmacology, Preventive  
Medicine, and C.H.R.P. Extracorporeal Technology  
SUNY Upstate Medical Center  
Syracuse, New York 13210*

#### REFERENCES

1. Moravec MA, Hurlbert BI: Hypokalemia associated with terbutaline administration in obstetrical patients. *Anesth Analg* 59: 917-920, 1980
2. Epstein FH, Rosa RM: Adrenergic control of serum potassium (editorial) *N Engl J Med* 309:1450-1451, 1983
3. Craig DB, Bose D: Drug interactions in anaesthesia: Chronic antihypertensive therapy. *Can Anaesth Soc J* 31:580-588, 1985
4. Eltherington LG: Complications of prior drug therapy, Complications in Anesthesiology. Edited by Orkin FK, Cooperman LH. Philadelphia, JB Lippincott, 1983, pp 25-47
5. Petch MC, McKay R, Bethune DW: The effect of beta 2 adrenergic blockade on serum potassium and glucose levels during open heart surgery. *Eur Heart J* 2:123-126, 1981
6. Struther AD, Reid JL, Whitesmith R, Rodger JC: The effects of cardioselective and non-selective beta-adrenoceptor blockade on the hypokalemia and cardiovascular response to adrenomedullary hormones in man. *Clin Sci* 65:143-147, 1983
7. Joyce JT, Roizen MF, Gerson JI, Grobecker H, Eger EI II, Forbes AR: Induction of anesthesia with halothane increases plasma norepinephrine concentrations. *ANESTHESIOLOGY* 56:286-290, 1982
8. Kramer CY: Extension of multiple range tests to group means with unequal numbers of replications. *Biometrics* 12:307-310, 1956

(Accepted for publication January 23, 1986.)

## Intravenous Lidocaine for Control of Coughing during Standby Cataract Surgery

*To the Editor:*—An occasional patient undergoing cataract surgery under retrobulbar and periorbital block will suddenly begin to cough or feel the urge to cough while the operation is underway and the eye is open.

I have used a technique in five patients that has proved efficacious in eliminating the coughing. Intravenous lidocaine in bolus doses of 0.3 to 0.4 mg/kg (usually 20 mg) not only stopped the coughing but eliminated the urge to cough. Obviously, one must be careful not to overdose the patient with lidocaine. However, I have never required more than 1.5 mg/kg throughout any

single case. Patients tolerate lidocaine very well and are often amazed at the anesthesiologist's ability to take away their cough during what may be a stressful time not only for the patient, but for the entire operating room staff.

WILLIAM M. FENTON, M.D.  
*Department of Anesthesia  
Twin Cities Community Hospital  
Templeton, California 93465*

(Accepted for publication January 24, 1986.)
